# Supplementary material for: Aqueous Extract of Sea Squirt (Halocynthia roretzi) with Potent Activity against Human Cancer Cells Acts Synergistically with Doxorubicin
Source: MDPI journal article supplement (doi:10.3390/md20050284), 2022-04-23
Supplement: s1 [file s1]

# SUPPLEMENTARY MATERIALS

## Aqueous extract of Sea Squirt (*Halocynthia roretzi*) with Potent Activity against Human Cancer Cells Acts Synergistically with Doxorubicin

Yuting Zhu<sup>1,2</sup>, Shanhao Han<sup>1,2</sup>, Jianhui Li<sup>1,2</sup>, Hongwei Gao<sup>3,\*</sup> and Bo Dong<sup>1,2,4,\*</sup>

1 Sars-Fang Centre, MoE Key Laboratory of Marine Genetics and Breeding, College of Marine Life Sciences, Ocean University of China, Qingdao 266003; yutingzhu19@hotmail.com (Y.Z.); hanshanhao@stu.ouc.edu.cn (S.H.); lijianhui@stu.ouc.edu.cn (J.L.); bodong@ouc.edu.cn (B.D.)

2 Laboratory for Marine Biology and Biotechnology, Qingdao National Laboratory for Marine Science and Technology, Qingdao 266237, China;

3 Technology Center of Qingdao Customs, Qingdao 266002, China, [ghw75@126.com](mailto:ghw75@126.com) (H.G.)

4 Institute of Evolution & Marine Biodiversity, Ocean University of China, Qingdao 266003, China.

\* Correspondence: [ghw75@126.com](mailto:ghw75@126.com) (H.G.); [bodong@ouc.edu.cn](mailto:bodong@ouc.edu.cn) (B.D.); Tel.: +86-0532-82032732

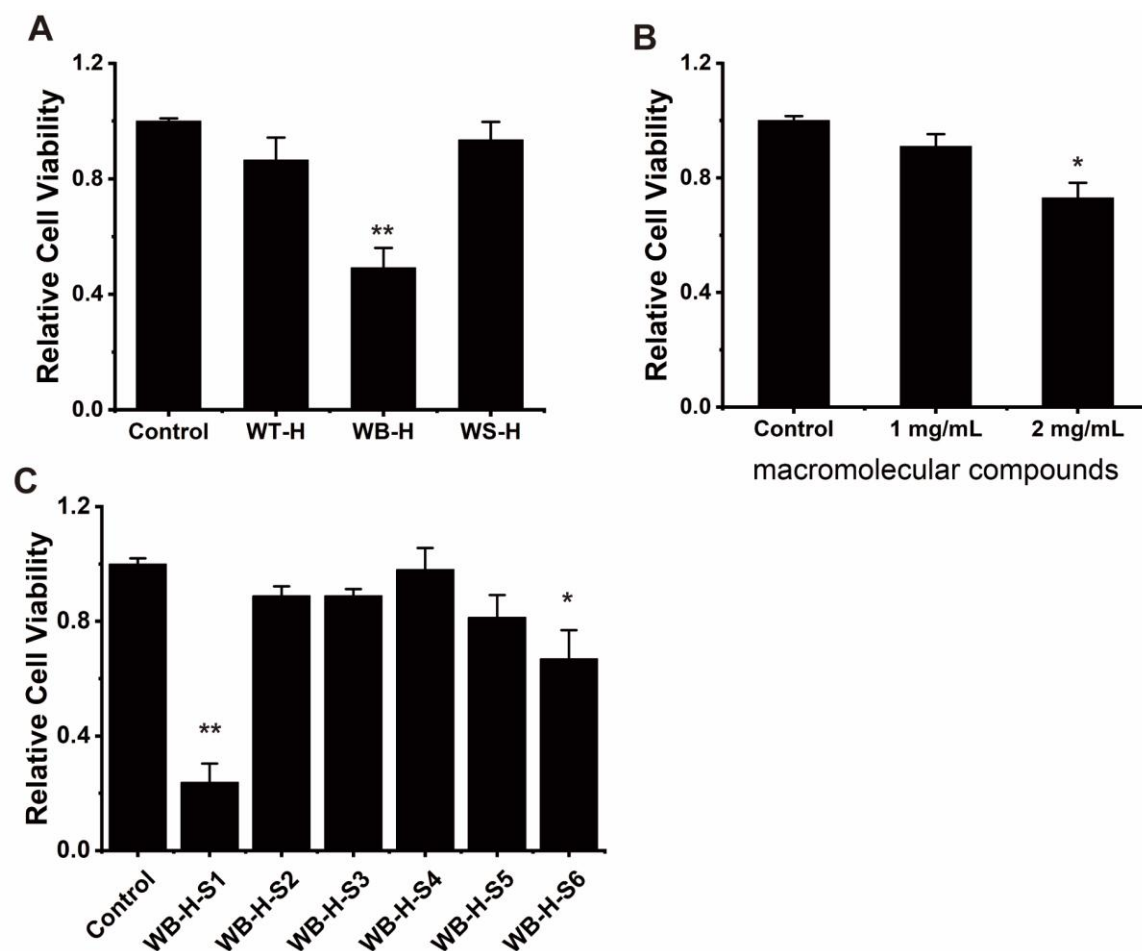

**Figure S1.** (A) HepG 2 cells were treated with aqueous extracts from tunic (WT-H), body tissue (WB-H), and stolon (WS-H) from *H. roretzi* at concentration of 100  $\mu$ L/mL for 24 h. Relative cell viability was measured by MTT assay. (B) HepG 2 cells were treated with macromolecule part of WB-H at concentration of 1 mg/mL and 2 mg/mL or with same volume of distilled water for 48 h. (C) Small molecular part of WB-H was divided into six components. HepG 2 cells were treated with six parts at concentration of 400  $\mu$ g/mL or the same volume of methanol (Control) for 48 h. Data are mean  $\pm$  SEM,  $n = 3$ , \* $p < 0.05$ , \*\* $p < 0.01$ .

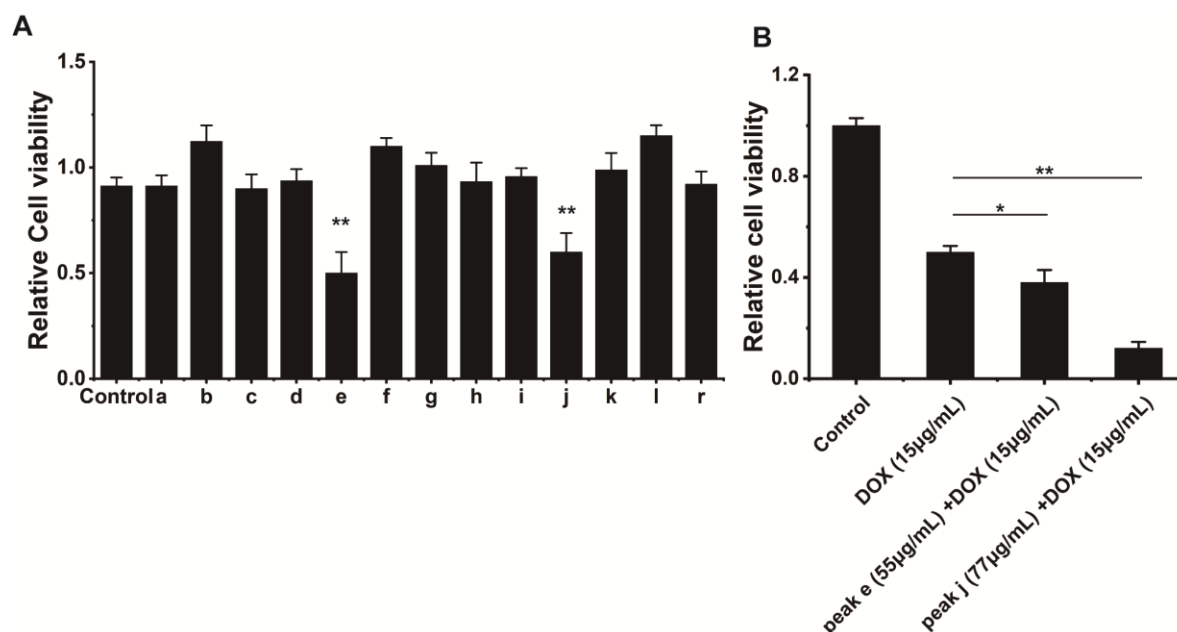

**Figure S2.** (A) HepG 2 cells were treated with compounds from peaks a-l and the rest of the eluting portion (r) at concentration of 50 µg/mL or methanol (Control) for 48 h. Relative cell viability was measured by MTT assay. (B) HepG 2 cells were exposed to doxorubicin at the concentrations of 15 µg/mL for 48 h in the presence or absence of peak e or peak j at the concentrations of 55 µg/mL and 77 µg/mL, respectively. Relative cell viability was measured by MTT assay. Data are mean  $\pm$  SEM, n = 3, \*p < 0.05, \*\*p < 0.01.

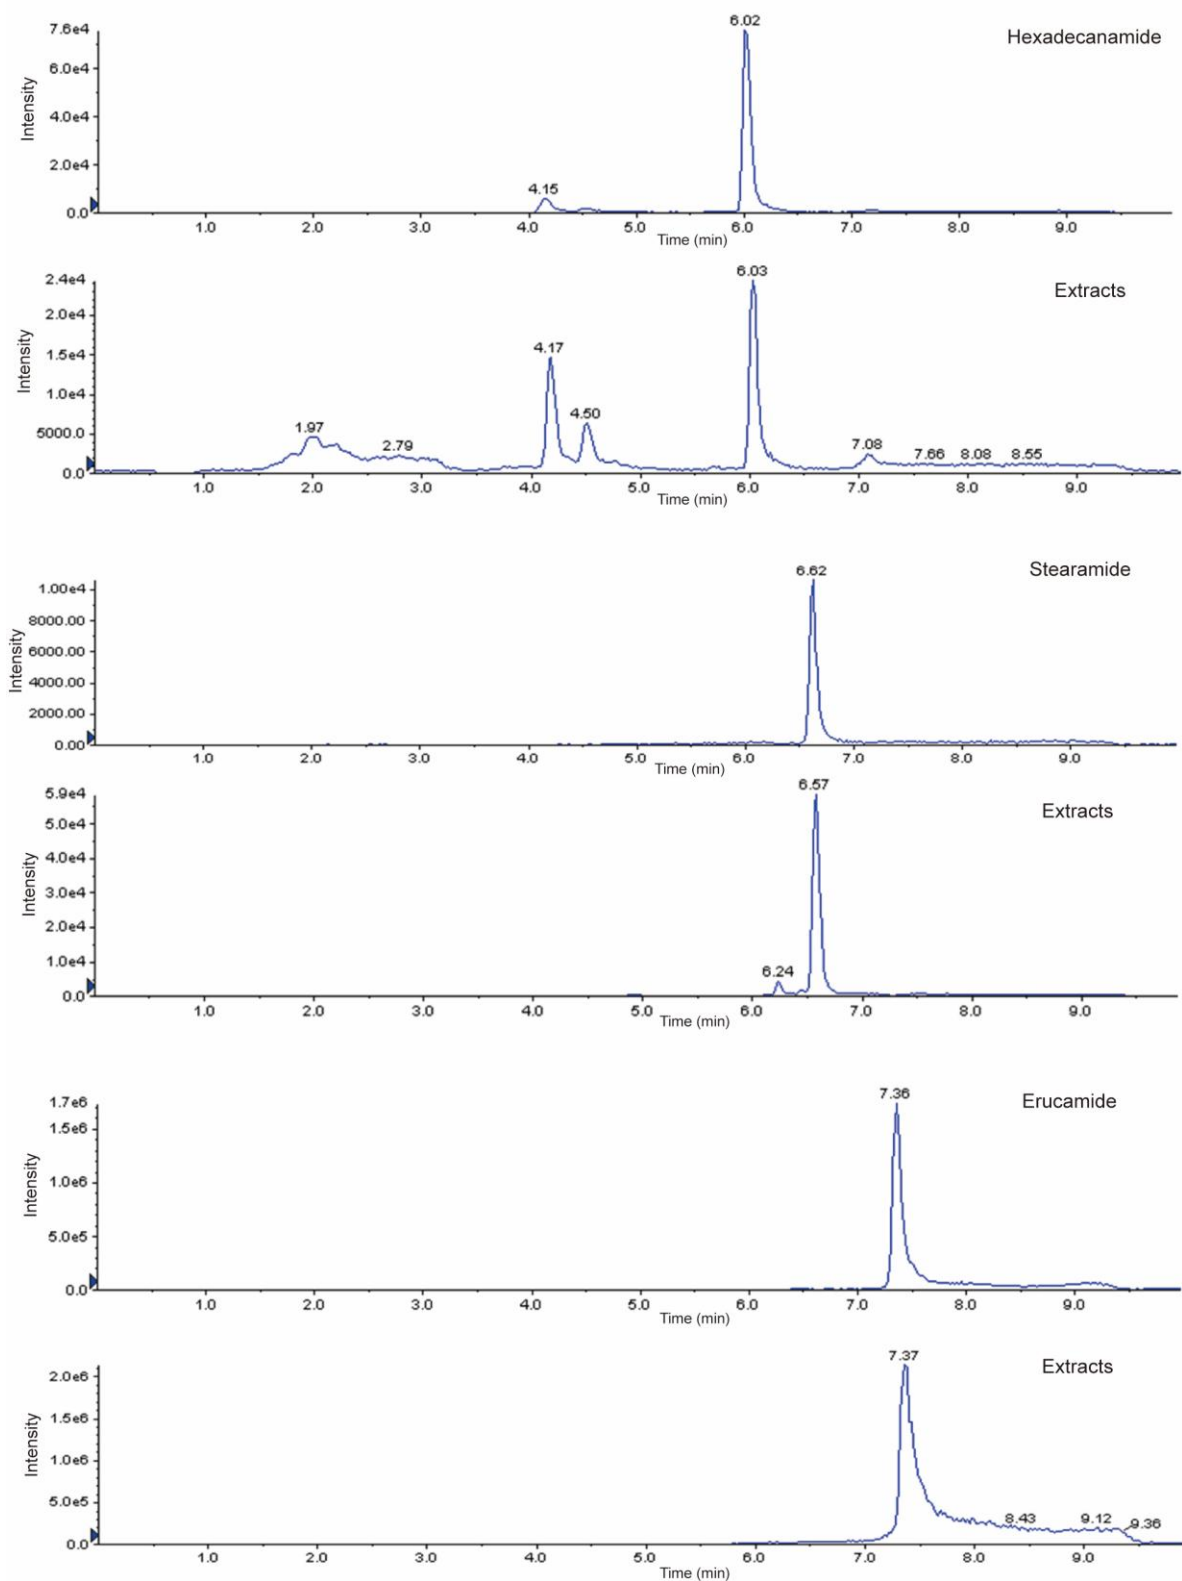

**Figure S3.** Ion chromatograms of fatty acid amides from *H. roretzi* extracts and standards.

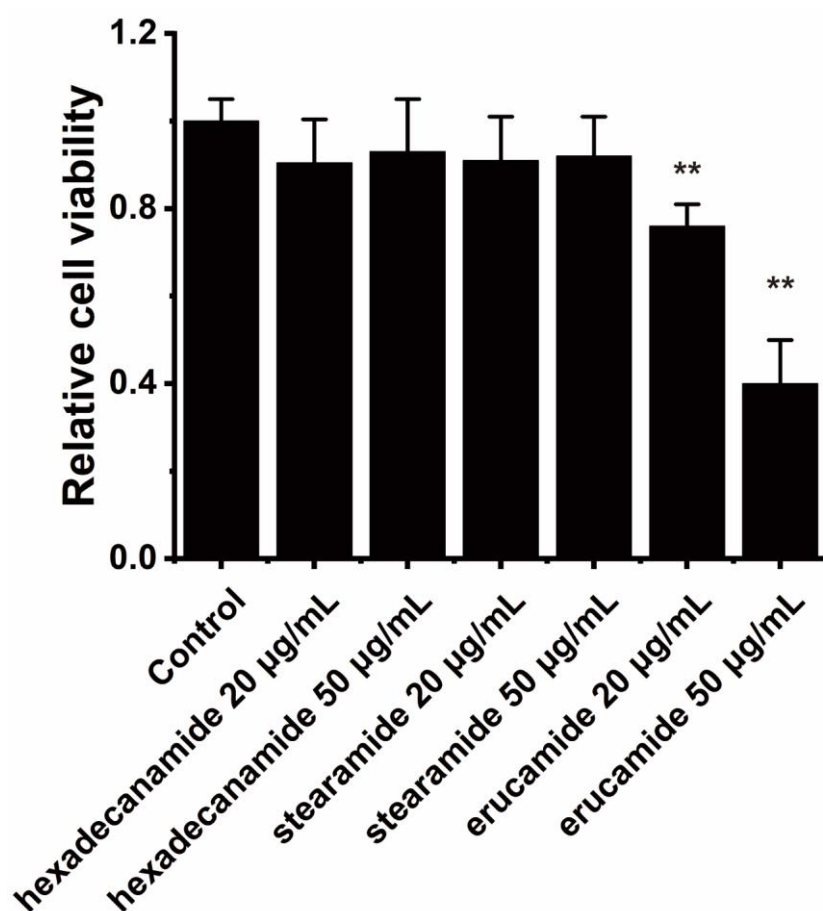

**Figure S4.** HepG 2 cells were treated with hexadecanamide, stearamide, and erucamide, respectively at concentration of 20 µg/mL and 50 µg/mL or methanol (Control) for 48 h. Relative cell viability was measured by MTT assay. Data are mean  $\pm$  SEM, n = 3, \*\*p < 0.01.
